# Supplementary material for: Synthesis, characterization, interaction with DNA and cytotoxicity of Pd(ii) and Pt(ii) complexes containing pyridine carboxylic acid ligands
Source: Royal Society of Chemistry journal article supplement (doi:10.1039/c2dt32114a), 2012-12-17
Supplement: c2dt32114a.pdf [file c2dt32114a.pdf]

*Electronic Supplementary Information for*

## Synthesis, characterization, interaction with DNA and cytotoxicity of Pd(II) and Pt(II) complexes containing pyridine carboxylic acid ligands

Ya-guang Sun,<sup>\*a</sup> Di Sun,<sup>a</sup> Wan Yu,<sup>a</sup> Ming-chang Zhu,<sup>a</sup> Fu Ding,<sup>a</sup> Yi-nan Liu,<sup>\*b</sup> En-jun Gao,<sup>a</sup>  
Shu-ju Wang,<sup>a</sup> Gang Xiong,<sup>c</sup> Ileana Dragutan,<sup>d</sup> Valerian Dragutan<sup>d</sup>

<sup>a</sup>Laboratory of Coordination Chemistry, Shenyang University of Chemical Technology, Shenyang 110142, China.

<sup>b</sup>Science and Technology College of Shenyang Agricultural University, Fushun 113122, China.

<sup>c</sup>Department of Chemistry, Nankai University, Tianjin 300007, China.

<sup>d</sup>Institute of Organic Chemistry, Romanian Academy, Spl. Independentei 202B, Bucharest 060023, Romania.

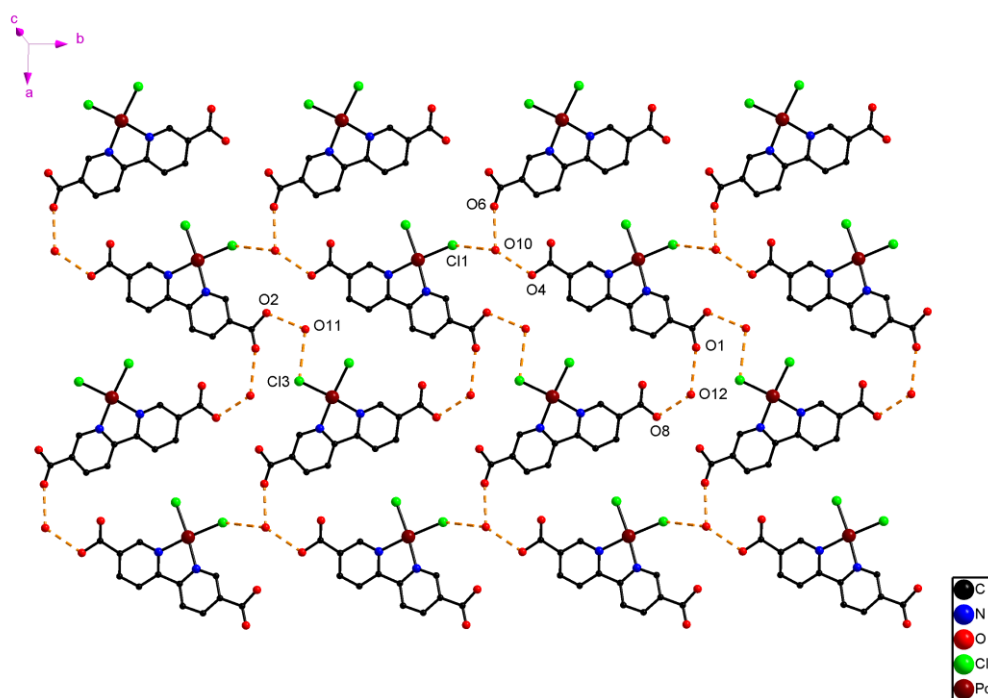

**Fig. S1** Two-dimensional structure of complex **1** connected via hydrogen bond.

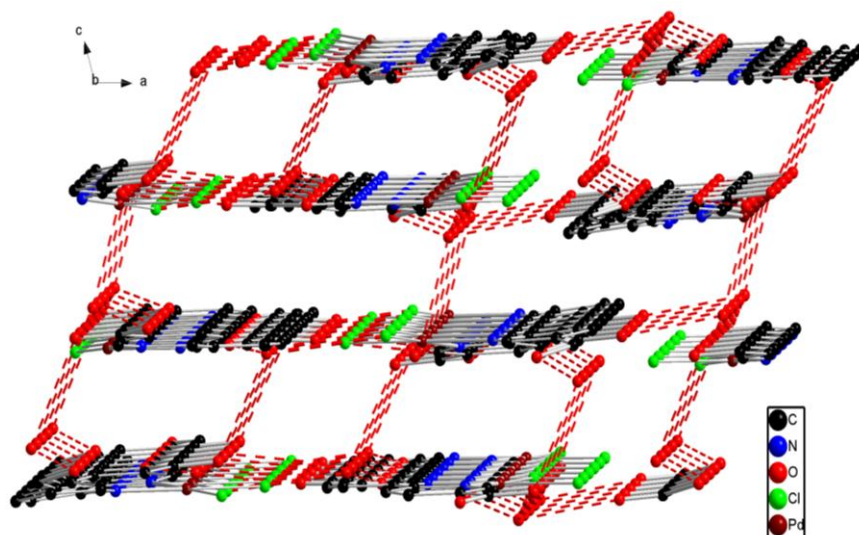

**Fig. S2** Three-dimensional structure of complex 1 connected via hydrogen bond.

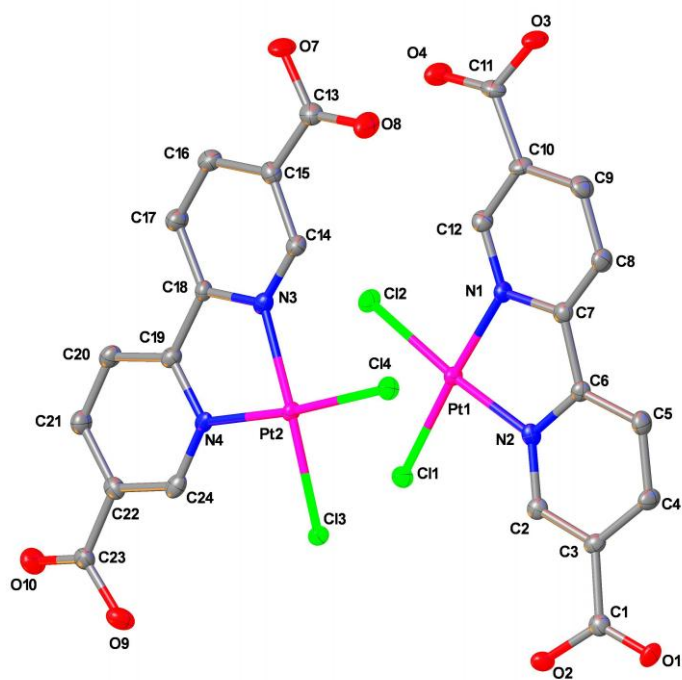

**Fig. S3** Molecular structure of the complex 2.

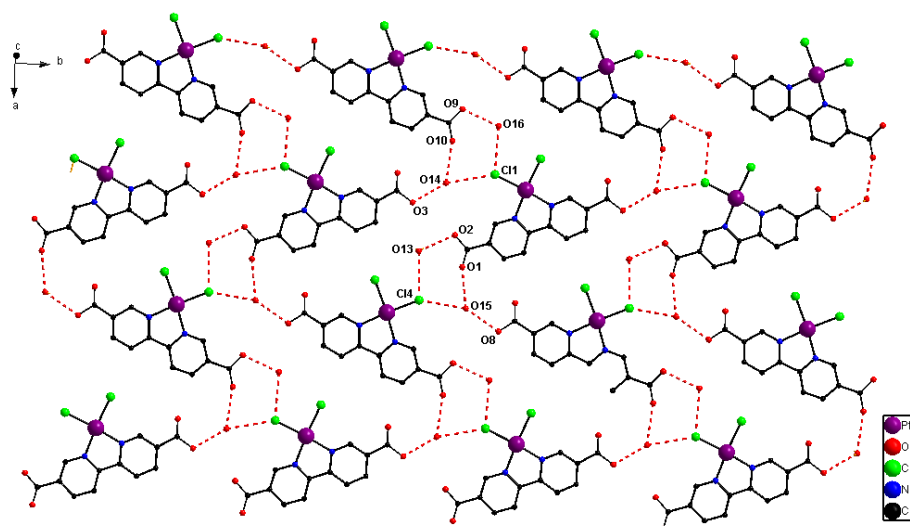

**Fig. S4** Two-dimensional structure of complex **2** connected via hydrogen bond.

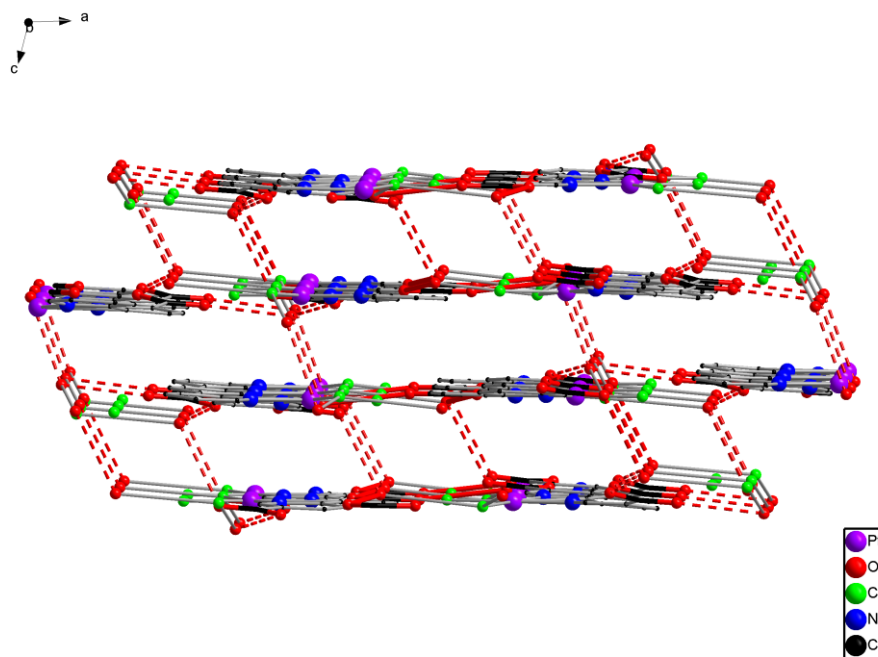

**Fig. S5** Three-dimensional structure of complex **2** connected via hydrogen bond.

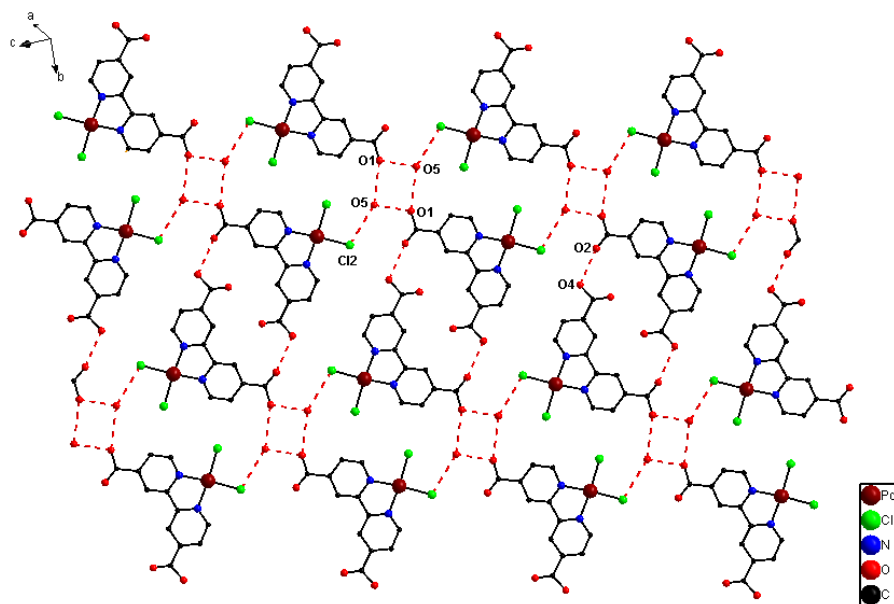

**Fig. S6** Two-dimensional structure of complex **3** connected via hydrogen bond.

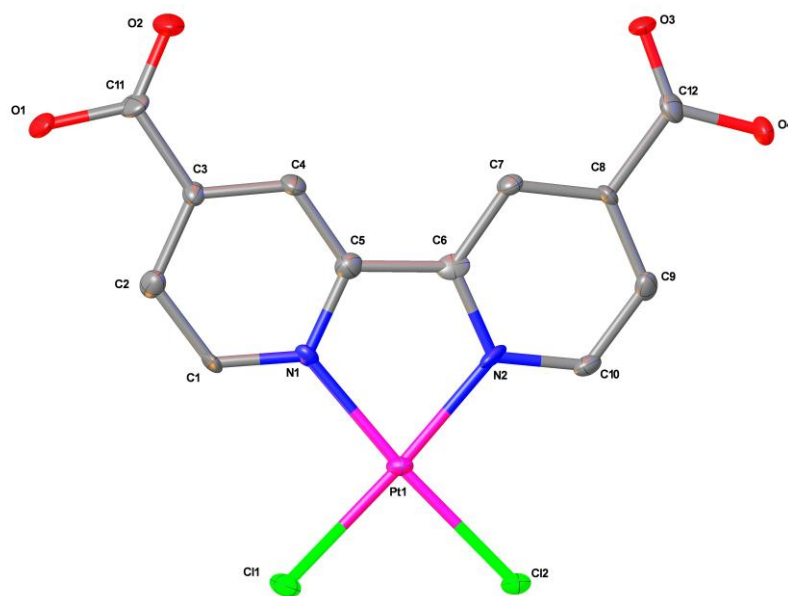

**Fig. S7** Molecular structure of the complex **4**.

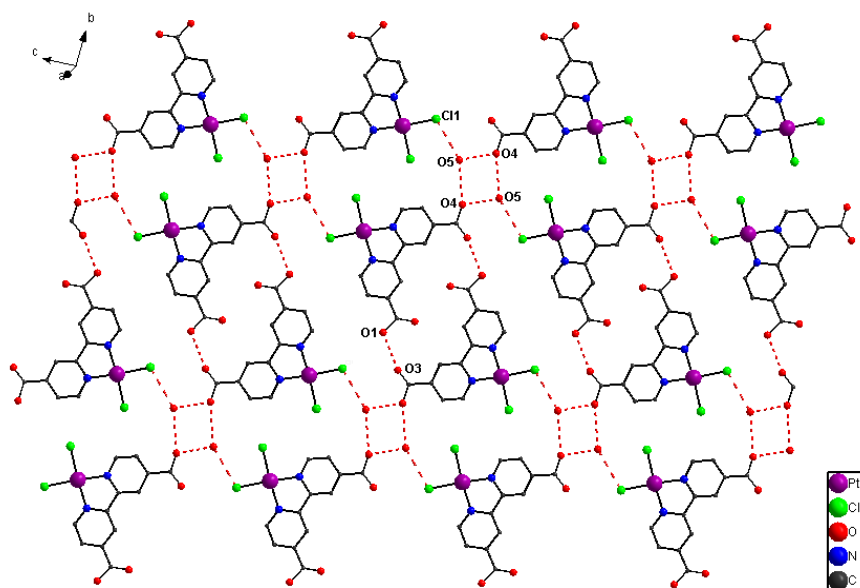

**Fig. S8** Two-dimensional structure of complex **4** connected via hydrogen bond.

**Table S1** Crystal data and refinement for complexes **1-4**.

|                                                                             | <b>1</b>                                                                         | <b>2</b>                                                                         | <b>3</b>                                                                         | <b>4</b>                                                                         |
|-----------------------------------------------------------------------------|----------------------------------------------------------------------------------|----------------------------------------------------------------------------------|----------------------------------------------------------------------------------|----------------------------------------------------------------------------------|
| Empirical formula                                                           | C <sub>12</sub> H <sub>12</sub> Cl <sub>2</sub> N <sub>2</sub> O <sub>6</sub> Pd | C <sub>12</sub> H <sub>12</sub> Cl <sub>2</sub> N <sub>2</sub> O <sub>6</sub> Pt | C <sub>12</sub> H <sub>10</sub> Cl <sub>2</sub> N <sub>2</sub> O <sub>5</sub> Pd | C <sub>12</sub> H <sub>10</sub> Cl <sub>2</sub> N <sub>2</sub> O <sub>5</sub> Pt |
| Formula weight                                                              | 457.54                                                                           | 546.23                                                                           | 439.52                                                                           | 528.21                                                                           |
| Temperature (K)                                                             | 293(2) K                                                                         | 293(2) K                                                                         | 293(2) K                                                                         | 293(2) K                                                                         |
| Wavelength                                                                  | 0.71073 Å                                                                        | 0.71075 Å                                                                        | 0.71073 Å                                                                        | 0.71073 Å                                                                        |
| Crystal system                                                              | Monoclinic,                                                                      | Monoclinic,                                                                      | Triclinic                                                                        | Triclinic                                                                        |
| Space group                                                                 | P2(1)/c                                                                          | P2(1)/c                                                                          | P-1                                                                              | P-1                                                                              |
| a (Å)                                                                       | 16.780(3)                                                                        | 16.640(2)                                                                        | 7.2791(15)                                                                       | 7.3879(15)                                                                       |
| b(Å)                                                                        | 13.895(3)                                                                        | 13.7906(18)                                                                      | 8.0941(16)                                                                       | 7.9746(16)                                                                       |
| c(Å)                                                                        | 13.596(3)                                                                        | 13.6697(19)                                                                      | 12.513(3)                                                                        | 12.542(3)                                                                        |
| Volume (Å <sup>3</sup> )                                                    | 3022.0(11)                                                                       | 3014.6(7)                                                                        | 698.8(2)                                                                         | 697.1(3)                                                                         |
| Z                                                                           | 8                                                                                | 8                                                                                | 2                                                                                | 2                                                                                |
| Density(calculated) (Mg/m <sup>3</sup> )                                    | 2.011                                                                            | 2.407                                                                            | 2.089                                                                            | 2.517                                                                            |
| Absorption coefficient (mm <sup>-1</sup> )                                  | 1.614                                                                            | 9.696                                                                            | 1.735                                                                            | 10.473                                                                           |
| F(000)                                                                      | 1808                                                                             | 2064                                                                             | 432                                                                              | 496                                                                              |
| θ Range for data collection (°)                                             | 1.94 to 27.53                                                                    | 3.10 to 25.02                                                                    | 2.88 to 25.01                                                                    | 2.63 to 25.01                                                                    |
| Reflections collected/unique                                                | 24305/6938[R(int) =<br>0.0581]                                                   | 18633/5314[R(int) =<br>0.0686]                                                   | 5067/2443[R(int) =<br>0.0199]                                                    | 4748/2452[R(int) =<br>0.0423]                                                    |
| Absorption correction                                                       | Semi-empirical<br>from equivalents                                               | Semi-empirical from<br>equivalent                                                | Semi-empirical<br>from equivalents                                               | Semi-empirical<br>from equivalent                                                |
| Refinement method                                                           | Full-matrixleast-<br>squares on F <sup>2</sup>                                   |
| Data/restraints/parameters                                                  | 6938 / 14 / 447                                                                  | 5314 / 9 / 421                                                                   | 2443 / 3 / 201                                                                   | 2452 / 3 / 201                                                                   |
| Goodness-of-fit on F <sup>2</sup>                                           | 1.051                                                                            | 1.109                                                                            | 1.136                                                                            | 1.021                                                                            |
| Final R indices [I > 2σ(I)]                                                 | R1 = 0.0406,<br>wR2 = 0.0817                                                     | R1 = 0.0521,<br>wR2 = 0.0863                                                     | R1 = 0.0224,<br>wR2 = 0.0625                                                     | R1 = 0.0355,<br>wR2 = 0.0771                                                     |
| R indices (all data)                                                        | R1 = 0.0581,<br>wR2 = 0.0893                                                     | R1 = 0.0765,<br>wR2 = 0.0925                                                     | R1 = 0.0255,<br>wR2 = 0.0637                                                     | R1 = 0.0394,<br>wR2 = 0.0788                                                     |
| Largest diff. peak and hole<br>(e Å <sup>-3</sup> )                         | 0.858 and -1.353                                                                 | 1.779 and -0.903                                                                 | 1.584 and -0.486                                                                 | 1.688 and -2.142                                                                 |
| Crystallographic Data Center as<br>supplementary publication number<br>CCDC | 733797                                                                           | 733798                                                                           | 729229                                                                           | 729232                                                                           |

**Table S2** Selected bond lengths (Å) and angles (°) for complex **1** and **2** together with the calculated values by DFT.

| complex <b>1</b>  |            |              | complex <b>2</b>  |            |              |
|-------------------|------------|--------------|-------------------|------------|--------------|
|                   | Exp. value | 6-311G(d, p) |                   | Exp. value | 6-311G(d, p) |
| Pd(1)-Cl(1)       | 2.2953(10) | 2.3267       | Pt(2)-Cl(3)       | 2.283(3)   | 2.3455       |
| Pd(1)-Cl(2)       | 2.2910(9)  | 2.3235       | Pt(2)-Cl(4)       | 2.274(3)   | 2.3455       |
| Pd(1)-N(1)        | 2.025(3)   | 2.0962       | Pt(2)-N(3)        | 1.998(8)   | 2.0560       |
| Pd(1)-N(2)        | 2.022(3)   | 2.0969       | Pt(2)-N(4)        | 1.999(8)   | 2.0560       |
| O(1)-C(1)         | 1.202(4)   | 1.2056       | O(7)-C(13)        | 1.199(15)  | 1.2020       |
| O(2)-C(1)         | 1.336(4)   | 1.3433       | O(8)-C(13)        | 1.292(15)  | 1.3524       |
| O(3)-C(12)        | 1.221(4)   | 1.2020       | O(9)-C(23)        | 1.249(15)  | 1.2020       |
| O(4)-C(12)        | 1.319(5)   | 1.3524       | O(10)-C(23)       | 1.227(15)  | 1.3524       |
| Cl(2)-Pd(1)-Cl(1) | 89.23(3)   | 91.58        | Cl(3)-Pt(2)-Cl(4) | 88.75(10)  | 90.32        |
| N(1)-Pd(1)-Cl(1)  | 95.74(9)   | 94.79        | N(3)-Pt(2)-Cl(4)  | 176.3(3)   | 174.63       |
| N(1)-Pd(1)-Cl(2)  | 175.02(9)  | 173.64       | N(3)-Pt(2)-Cl(3)  | 94.9(3)    | 95.05        |
| N(2)-Pd(1)-Cl(1)  | 176.17(8)  | 173.55       | N(4)-Pt(2)-Cl(4)  | 96.1(2)    | 95.05        |
| N(2)-Pd(1)-Cl(2)  | 94.36(8)   | 94.87        | N(4)-Pt(2)-Cl(3)  | 175.2(3)   | 174.63       |
| N(2)-Pd(1)-N(1)   | 80.67(12)  | 78.76        | N(3)-Pt(2)-N(4)   | 80.3(3)    | 79.58        |
| O(2)-C(1)-O(1)    | 123.8(4)   | 124.06       | O(7)-C(13)-O(8)   | 124.5(11)  | 123.57       |
| O(3)-C(12)-O(4)   | 123.0(4)   | 123.57       | O(9)-C(23)-O(10)  | 124.8(13)  | 123.57       |
| Cl(2)-Pd(1)-Cl(1) | 89.56(4)   | 91.40        | Cl(2)-Pt(1)-Cl(1) | 89.14(10)  | 90.06        |
| N(1)-Pd(1)-Cl(1)  | 94.45(7)   | 94.81        | N(1)-Pt(1)-Cl(2)  | 94.9(3)    | 95.09        |
| N(1)-Pd(1)-Cl(2)  | 175.99(6)  | 173.78       | N(1)-Pt(1)-Cl(1)  | 176.0(3)   | 174.85       |
| N(2)-Pd(1)-Cl(2)  | 95.40(7)   | 94.82        | N(2)-Pt(1)-Cl(2)  | 175.7(2)   | 174.85       |
| N(2)-Pd(1)-Cl(1)  | 174.36(7)  | 173.78       | N(2)-Pt(1)-Cl(1)  | 95.1(2)    | 95.09        |
| N(2)-Pd(1)-N(1)   | 80.58(9)   | 78.97        | N(2)-Pt(1)-N(1)   | 80.8(2)    | 79.75        |
| O(2)-C(11)-O(1)   | 124.4(3)   | 123.80       | O(2)-C(1)-O(1)    | 125.3(7)   | 123.74       |
| O(3)-C(12)-O(4)   | 124.7(3)   | 123.80       | O(3)-C(11)-O(4)   | 124.7(7)   | 123.74       |

**Table S3** Selected bond lengths (Å) and angles (°) for complex **3** and **4** together with the calculated values by DFT.

| complex <b>3</b> |            |              | complex <b>4</b> |            |              |
|------------------|------------|--------------|------------------|------------|--------------|
|                  | Exp. value | 6-311G(d, p) |                  | Exp. value | 6-311G(d, p) |
| Pd(1)-Cl(1)      | 2.2974(10) | 2.3286       | Pt(1)-Cl(1)      | 2.299(2)   | 2.3502       |
| Pd(1)-Cl(2)      | 2.2957(10) | 2.3286       | Pt(1)-Cl(2)      | 2.2982(19) | 2.3502       |
| Pd(1)-N(1)       | 2.010(2)   | 2.0909       | Pt(1)-N(1)       | 2.005(6)   | 2.0497       |
| Pd(1)-N(2)       | 2.020(2)   | 2.0909       | Pt(1)-N(2)       | 2.000(6)   | 2.0497       |
| O(1)-C(11)       | 1.315(3)   | 1.3460       | O(1)-C(11)       | 1.322(9)   | 1.3466       |
| O(2)-C(11)       | 1.207(4)   | 1.2045       | O(2)-C(11)       | 1.213(9)   | 1.2048       |
| O(3)-C(12)       | 1.198(3)   | 1.2045       | O(3)-C(12)       | 1.214(9)   | 1.3466       |
| O(4)-C(12)       | 1.334(3)   | 1.3460       | O(4)-C(12)       | 1.323(9)   | 1.2048       |

**Table S4** HOMO and LUMO energies of complexes **1-4**.

|                                      | 1       | 2       | 3       | 4       |
|--------------------------------------|---------|---------|---------|---------|
| $E_{\text{HOMO}}$ (a.u.)             | -0.2627 | -0.2471 | -0.2634 | -0.2487 |
| $E_{\text{LUMO}}$ (a.u.)             | -0.1218 | -0.1237 | -0.1180 | -0.1196 |
| $\Delta E_{\text{LUMO-HOMO}}$ (a.u.) | 0.1409  | 0.1234  | 0.1454  | 0.1291  |
